# Supplementary material for: Structural and Dynamic Features of the Recognition of 8-oxoguanosine Paired with an 8-oxoG-clamp by Human 8-oxoguanine-DNA Glycosylase
Source: MDPI journal article supplement (doi:10.3390/cimb46050253), 2024-04-29

## Supplementary Materials

Supplementary Figure S1. Results of the EMSA experiments (native gel electrophoresis).

A. DNA duplexes visualization by staining with SYBR Green

B. Visualization by FAM-label in DNA strain

The conditions of experiment are indicated in pictures

A

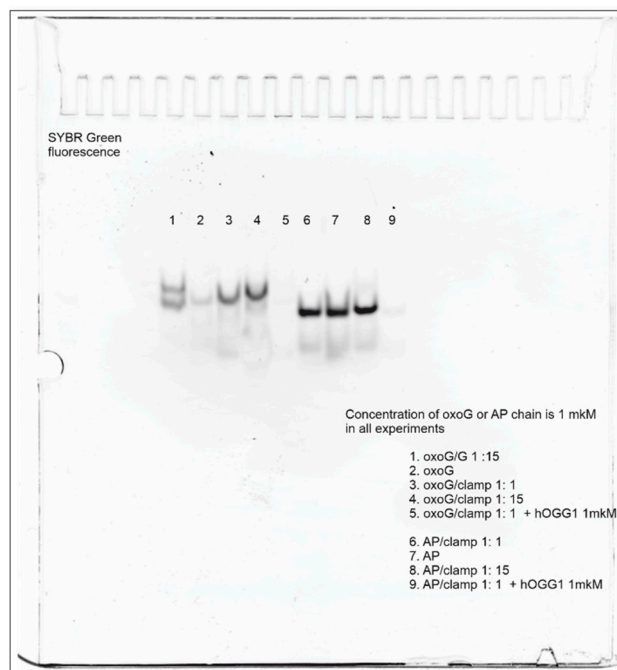

B

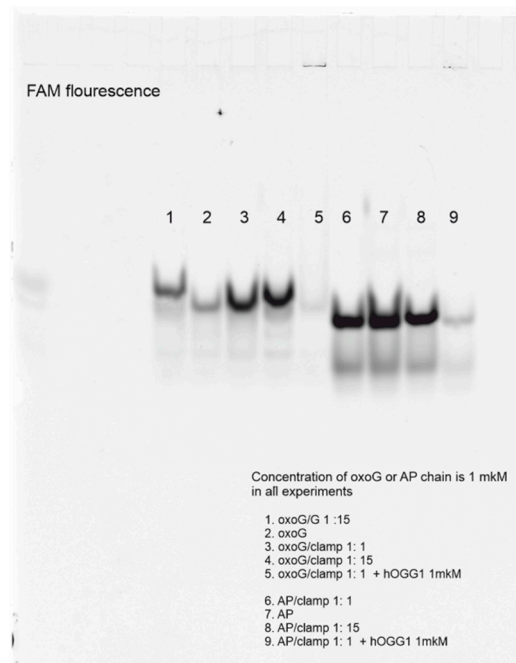

Supplement: s1 [file s1]
